# Supplementary material for: Structural, optical, and gas sensing properties of Ce, Nd, and Pr doped ZnS nanostructured thin films prepared by nebulizer spray pyrolysis method
Source: publisher site journal article supplement (doi:10.1515/ntrev-2025-0232), 2025-01-01
Supplement: Supplementary file 1 [file j_ntrev-2025-0232_suppl_001.docx]

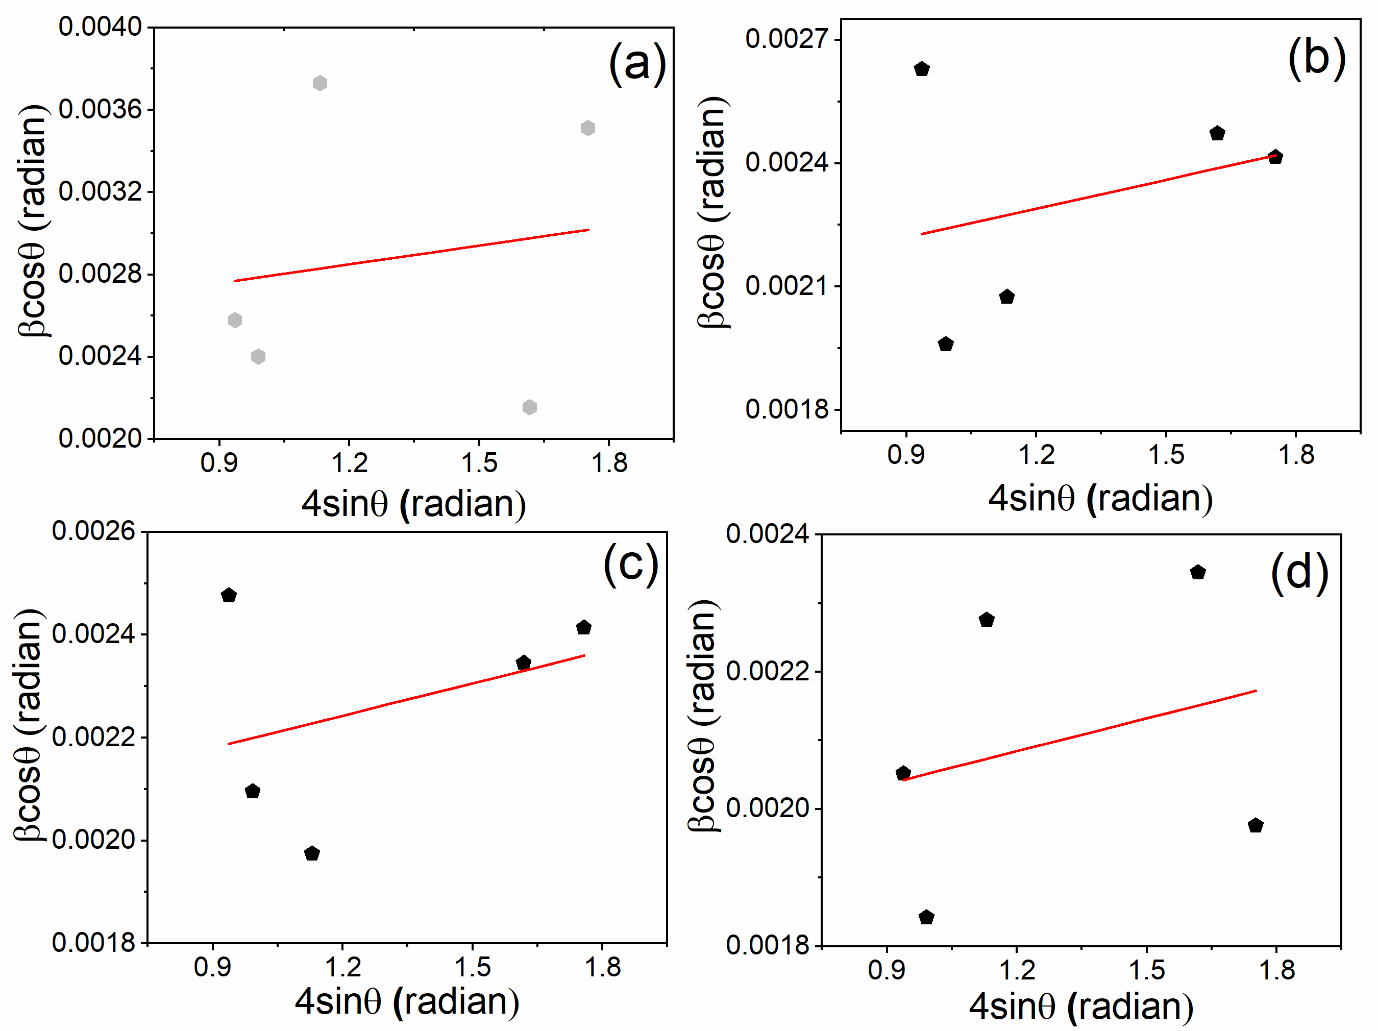


**Figure S1** W-H plot of (a) pure ZnS, (b) Ce-doped ZnS, (c) Pr-doped ZnS, and (d) Nd-doped ZnS thin films


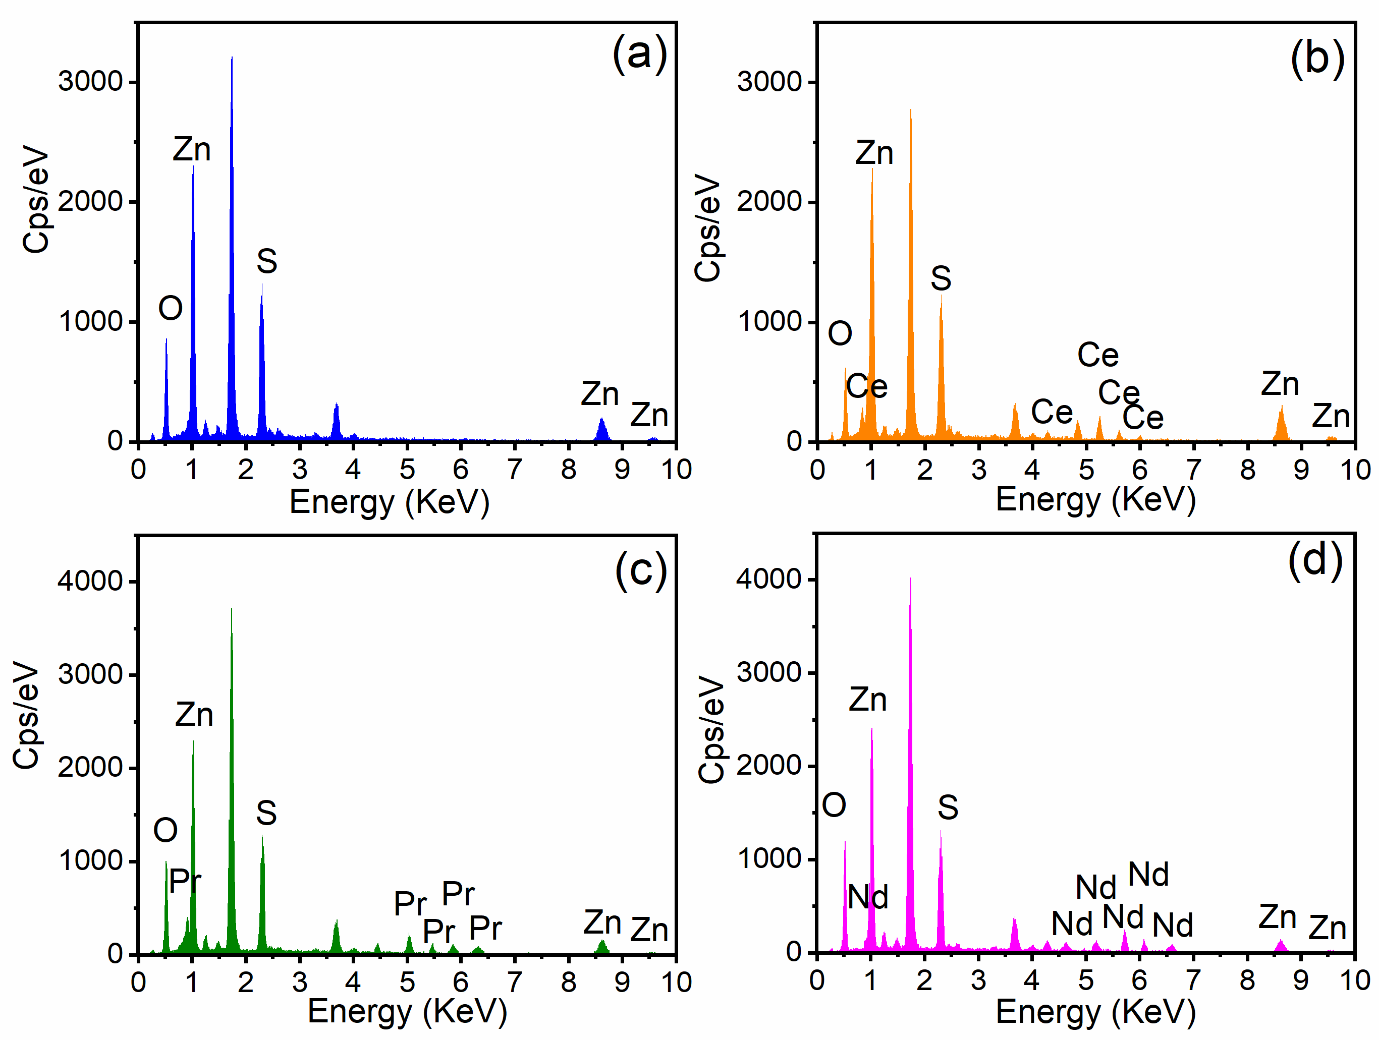


**Figure S2** EDX images of (a) pure ZnS, (b) Ce-doped ZnS, (c) Pr-doped ZnS, and (d) Nd-doped ZnS thin films
